# Supplementary material for: A human patient-derived cellular model of Joubert syndrome reveals ciliary defects which can be rescued with targeted therapies
Source: PubMed Central journal article supplement (PMC5886250; doi:10.1093/hmg/ddx347), 2017-09-11
Supplement: 1_supplementary_material_revised_final_nomarkings_ddx347.pdf [file 1_supplementary_material_revised_final_nomarkings_ddx347.pdf]

## Supplementary Material

### A human patient-derived cellular model of Joubert syndrome reveals ciliary defects which can be rescued with targeted therapies

Shalabh Srivastava, Simon A. Ramsbottom, Elisa Molinari, Sumaya Alkanderi, Andrew Filby, Kathryn White, Charline Henry, Sophie Saunier, Colin G. Miles & John A. Sayer

**Table S1. Common variants identified in the two siblings.**

| Patient s   | Genomic position (GRCh37) | Gene   | Gene name                                 | RefSeq accession | Nt change c. | AA change p. | Polyphen 2 (score) | Sift (score) | Hom/het | Coverage ref/var (II:2; II:1) | HGMD (gene/variant) | Disease                    | ExAC (freq) |
|-------------|---------------------------|--------|-------------------------------------------|------------------|--------------|--------------|--------------------|--------------|---------|-------------------------------|---------------------|----------------------------|-------------|
| Family JBTS | Chr12:88496758            | CEP290 | Centrosomal protein 290KD                 | NM_025114        | c.2848dup    | p.Q950Pfs*6  | -                  | -            | het     | (71/81); (64/154)             | Yes/No              | ciliopathies               | -           |
|             | Chr12:88500452            | CEP290 | Centrosomal protein 290KD                 | NM_025114        | c.2817G>T    | p.K939N      | 0.771              | 0            | het     | (137/125); (79/202)           | Yes/No              | ciliopathies               | -           |
|             | Chr3:132403405            | NPHP3  | Nephrocystin 3                            | NM_153240        | c.3563A>G    | p.K1188R     | 0.336              | 0.23         | het     | (73/99); (95/75)              | Yes/No              | Nephronophthisis           | 2/121110    |
|             | Chr1:220154795            | EPRS   | Glutamyl-Prolyl-TRNA Synthetase           | NM_004446        | c.3378G>A    | p.M1126I     | 0.895              | 0            | het     | (154/107); (95/202)           | -                   | -                          | -           |
|             | Chr2:84775496             | DNAH6  | Dynein Axonemal Heavy Chain 6             | NM_001370        | c.1271A>G    | p.Y424C      | 0.976              | 0.01         | het     | (109/110); (76/163)           | Yes/No              | Heterotaxy                 | 11/121212   |
|             | Chr3:52424969             | DNAH1  | Dynein Axonemal Heavy Chain 1             | NM_015512        | c.9640G>A    | p.D3214N     | 0.999              | 0            | het     | (23/32); (14/30)              | Yes/No              | Primary ciliary dyskinesia | 1/22540     |
|             | Chr7:111617266            | DOCK4  | Dedicator Of Cytokinesis 4                | NM_014705        | c.622A>G     | p.S208G      | 0.599              | 0.09         | het     | (191/177); (133/130)          | -                   | -                          | -           |
|             | Chr12:112694200           | HECTD4 | HECT Domain E3 Ubiquitin Protein Ligase 4 | NM_001109662     | c.2819C>T    | p.T940M      | 0.293              | 0            | het     | (132/121); (106/190)          | -                   | -                          | -           |

Genes written in bold letters indicate likely disease-causative variants. Columns from left to right: position of the variant in GRCh37 (genomic position), chromosome (Chr), name of the gene in which the variant is detected (Gene), RefSeq accession, nucleotide (Nt) and amino acid (AA) change, Polyphen 2 (PP2) and SIFT Score (red : predict

disease causing, orange: intermediate, green: predict benign), homozygotes (hom) or heterozygotes (het) variants, number of reads whereby position is covered for reference allele (Ref) and variant allele (var), genes and variants reported in Biobase/HGMD and associated disease, allelic frequency in Exome Aggregation Consortium (ExAC).

**Table S2. Variants identified only in individual JBTS II:1**

| Patient          | Genomic position (GRCh37) | Gene          | Gene name                                       | RefSeq accession | Nt change c. | AA change p. | Polyphen2 (score) | Sift (score) | Hom/het | Coverage ref/var (II:1) | HGMD (gene/variant) | Disease                                               | ExAC (freq) |
|------------------|---------------------------|---------------|-------------------------------------------------|------------------|--------------|--------------|-------------------|--------------|---------|-------------------------|---------------------|-------------------------------------------------------|-------------|
| <b>JBTS II:1</b> | Chr6:38976675             | <b>DNAH8</b>  | <b>Dynein Axonemal Heavy Chain 8</b>            | NM_001206927     | c.13300C>T   | p.R4434W     | 1                 | 0            | het     | (91/110) (54%)          | Yes/No              | Primary ciliary dyskinesia                            | 35/121288   |
|                  | Chr2:108455304            | <b>RGPD4</b>  | <b>RANBP2-Like And GRIP Domain Containing 4</b> | NM_182588        | c.289G>C     | p.V97L       | 0.952             | 0            | het     | (20/19) (48%)           | -                   | -                                                     | -           |
|                  | Chr2:109379793            | <b>RANBP2</b> | <b>RAN binding protein 2</b>                    | NM_006267        | c.2798T>C    | p.M933T      | 0.321             | 0            | het     | (103/91) (46%)          | Yes/No              | Acute necrotizing encephalopathy                      | 1/120748    |
|                  | Chr14:23511928            | <b>PSMB11</b> | <b>Proteasome Subunit Beta 11</b>               | NM_001099780     | c.494G>A     | p.S165N      | 0.452             | 0.13         | het     | (12/10) (45%)           | -                   | -                                                     | 22/119892   |
|                  | Chr15:91565406            | <b>VPS33B</b> | <b>Vacuolar protein sorting 13B</b>             | NM_018668        | c.74A>G      | p.Q25R       | 0.006             | 0.43         | het     | (36/38) (51%)           | Yes/No              | Arthrogryposis-renal dysfunction-cholestasis syndrome | 0/23306     |
|                  | Chr3:51378717             | <b>DOCK3</b>  | <b>Dedicator of cyto-kinesis 3</b>              | NM_004947        | c.3816C>G    | p.D1272E     | 0.005             | 0.3          | het     | (6/8) (57%)             | Yes/No              | muscle hypotonia, ataxia, and intellectual disability | 47/110498   |

Genes written in bold letters indicate likely disease-causative variants. Columns from left to right: position of the variant in GRCh37 (genomic position), chromosome (Chr), name of the gene in which the variant is detected (Gene), RefSeq accession, nucleotide (Nt) and amino acid (AA) change, Polyphen 2 (PP2) and SIFT Score (red : predict disease causing, orange: intermediate, green: predict benign), homozygotes (hom) or heterozygotes (het) variants, number of reads whereby position is covered for reference allele (Ref) and variant allele (var), genes and variants reported in Biobase/HGMD and associated disease, allelic frequency in Exome Aggregation Consortium (ExAC).

**Table S3. Variants identified only in individual JBTS II:2**

| Patient          | Genomic position (GRCh37) | Gene           | Gene name                             | RefSeq accession | Nt change     | AA change p.    | Polyphen2 (score) | Sift (score) | Hom/het | Coverage ref/var (II:2) | HGM D (gene/variant) | Disease                                                  | ExAC (freq) |
|------------------|---------------------------|----------------|---------------------------------------|------------------|---------------|-----------------|-------------------|--------------|---------|-------------------------|----------------------|----------------------------------------------------------|-------------|
| <b>JBTS II:2</b> | Chr4:74124072             | <b>ANKRD17</b> | Ankyrin Repeat Domain 17              | NM_032217        | c.303_314 del | p.G107_G110 del | -                 | -            | het     | (49/41) (45%)           | -                    | -                                                        | 2/120728    |
|                  | Chr3:48019391             | <b>MAP4</b>    | Microtubule-associated protein 4      | NM_002375        | c.256A>G      | p.N86D          | 0.703             | 0.12         | het     | (56/69) (55%)           | Yes/No               | Seckel syndrome: growth retardation and normocephaly     | 1/121400    |
|                  | Chr15:86262432            | <b>AKAP13</b>  | A kinase (prka) anchor protein 13     | NM_006738        | c.6139G>A     | p.D2047N        | 0.998             | 0            | het     | (153/152) (49%)         | -                    | -                                                        | 51/121376   |
|                  | Chr16:722293              | <b>RHOT2</b>   | Ras Homolog Family Member T2          | NM_138769        | c.1235C>T     | p.T412M         | 0.998             | 0.01         | het     | (93/98) (51%)           | -                    | -                                                        | 89/119150   |
|                  | Chr16:19552027            | <b>CCP110</b>  | Centriolar Coiled-Coil Protein 110    | NM_001199022     | c.1967G>A     | p.R656Q         | 0.928             | 0.08         | het     | (212/191) (47%)         | -                    | -                                                        | 81/119426   |
|                  | Chr17:72741040            | <b>RAB37</b>   |                                       | NM_001163989     | c.476G>A      | p.R159H         | 0.871             | 0.01         | het     | (132/177) (57%)         | -                    | -                                                        | 33/121298   |
|                  | Chr6:38941567             | <b>DNAH8</b>   | Dynein Axonemal Heavy Chain 8         | NM_001206927     | c.12656G>A    | p.R4219Q        | 0.001             | 0.05         | het     | (64/58) (47%)           | Yes/No               | Primary ciliary dyskinesia                               | 20/120348   |
|                  | Chr7:157202588            | <b>DNAJB6</b>  | DnaJ homologue, subfamily B, member 6 | NM_058246        | c.791G>A      | p.R264Q         | 0.059             | 0.69         | het     | (32/14) (30%)           | Yes/No               | Myopathy                                                 | -           |
|                  | Chr8:124141323            | <b>TBC1D31</b> | TBC1 Domain Family Member 31          | NM_145647        | c.2135T>C     | p.M712T         | 0.050             | 0.01         | het     | (135/115) (46%)         | -                    | -                                                        | 3/120990    |
|                  | Chr9:124073114            | <b>GSN</b>     | Gelsolin                              | NM_000177        | c.657C>G      | p.D219E         | 0.875             | 0            | het     | (87/65) (42%)           | Yes/No               | Familial Amyloidosis of Finnish type, nephrotic syndrome | 1/120514    |
|                  | Chr15:42158038            | <b>SPTBN5</b>  | Spectrin, beta, non-erythrocytic 5    | NM_016642        | c.6886C>T     | p.R2296W        | 0.019             | 0.01         | het     | (14/5) (26%)            | Yes/No               | sacral agenesis                                          | 2/24600     |
|                  | Chr22:50969172            | <b>ODF3B</b>   | Outer Dense Fiber Of Sperm Tails 3B   | NM_001014440     | c.650A>C      | p.K217T         | 0.142             | 0.03         | het     | (62/48) (43%)           | -                    | -                                                        | 18/98930    |

Genes written in bold letters indicate likely disease-causative variants. Columns from left to right: position of the variant in GRCh37 (genomic position), chromosome (Chr), name of the gene in which the variant is detected (Gene), RefSeq accession, nucleotide (Nt) and amino acid (AA) change, Polyphen 2 (PP2) and SIFT Score (red : predict disease causing, orange: intermediate, green: predict benign), homozygotes (hom) or heterozygotes (het) variants, number of reads whereby position is covered for reference allele (Ref) and variant allele (var), genes and variants reported in Biobase/HGMD and associated disease, allelic frequency in Exome Aggregation Consortium (ExAC).

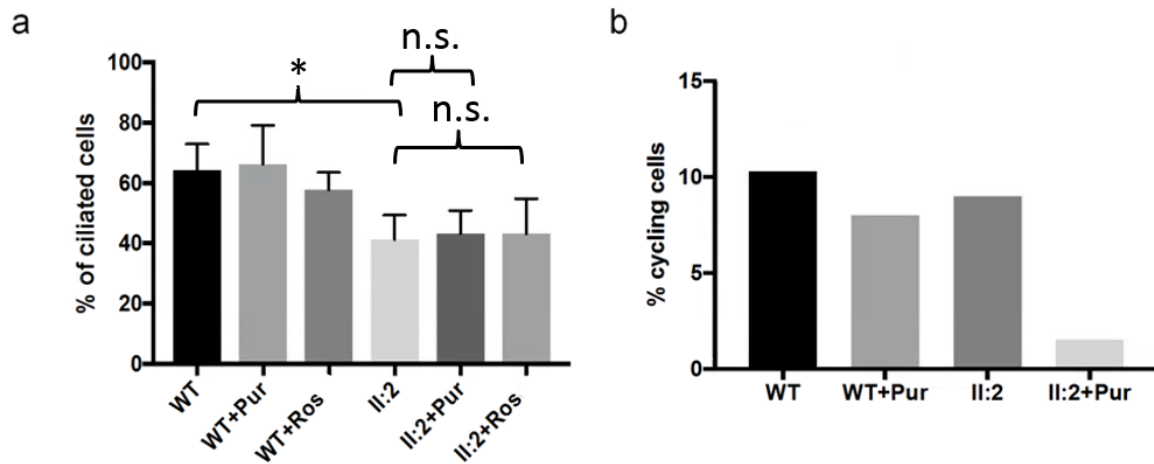

**Figure S1: Ciliation rates and FACS analysis of wild type and patient hURECs in response to treatments**

(a) Percentage rates of ciliation in serum starved wild type (WT) and JBTS patient II:2 in control conditions and following treatment with Purmorphamine (Pur) and Roscovitine (Ros). There is a significant difference in percentage ciliated cells between WT and II:2 (\*  $p < 0.001$ , Unpaired Student's t-test). Treatment of II:2 with Pur or Ros did not change percentage ciliation rates (n.s. not significant).

(b) FACS analysis, using propidium iodide for DNA staining, of wild type (WT) and II:2 hURECs before and after treatment with Purmorphamine (Pur). II:2 cells are sensitive to Pur treatment with a reduction in percentage cycling cells.

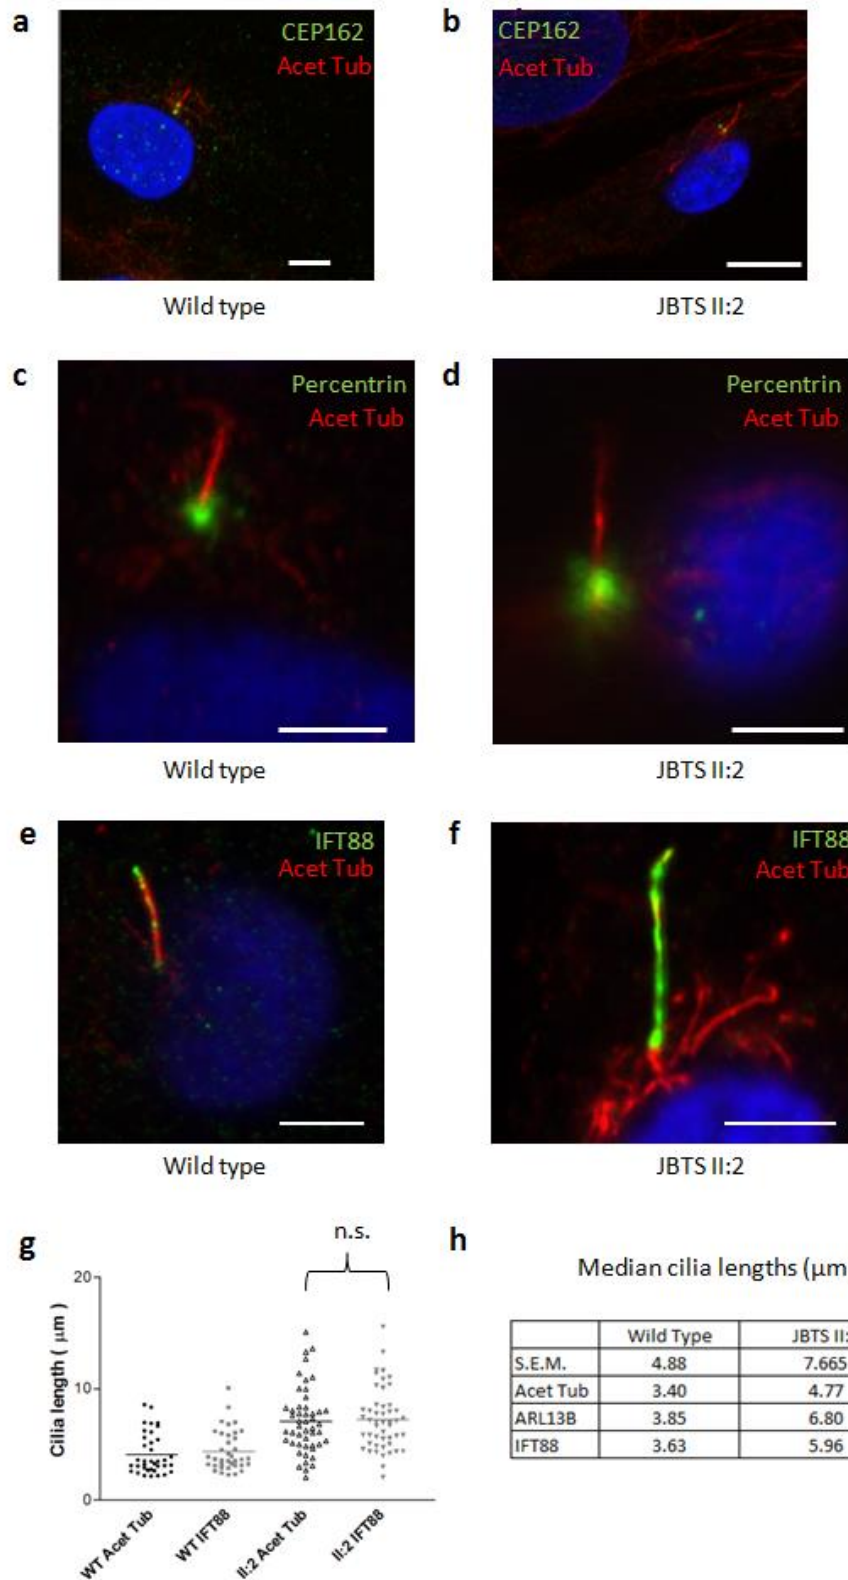

**Figure S2: Localisation of transition zone, centrosomal and ciliary proteins in wild type and patient JBTS II:2 hURECs.**

Immunofluorescence images showing (a & b) Wild type and patient JBTS II:2 hURECs with maintained localisation of CEP162 (green), a transition zone protein.

(c & d) Wild type and patient JBTS II:2 hURECs with maintained localisation of pericentrin (green), a centrosomal associated protein.

(e & f) Wild type and patient JBTS II:2 hURECs with localisation of IFT88 (green), an axonemal protein. Cilia are localised with alpha-acetylated tubulin (red). Scale bar 5  $\mu$ m.

(g) Quantification of ciliary length measured by immunofluorescence imaging using antibodies towards alpha-acetylated tubulin (Acet Tub) and IFT88. There is no significant (n.s. Paired Student's t-test) mismatch in ciliary length between these ciliary axonemal proteins. n numbers: WT cilia = 37, II:2 cilia = 49.

(h) Table showing median cilia length of wild type and JBTS II:2 hURECs when measured by scanning electron microscopy (SEM), and immunofluorescence microscopy using antibodies directed towards alpha-acetylated tubulin (Acet Tub), ARL13B and IFT88.

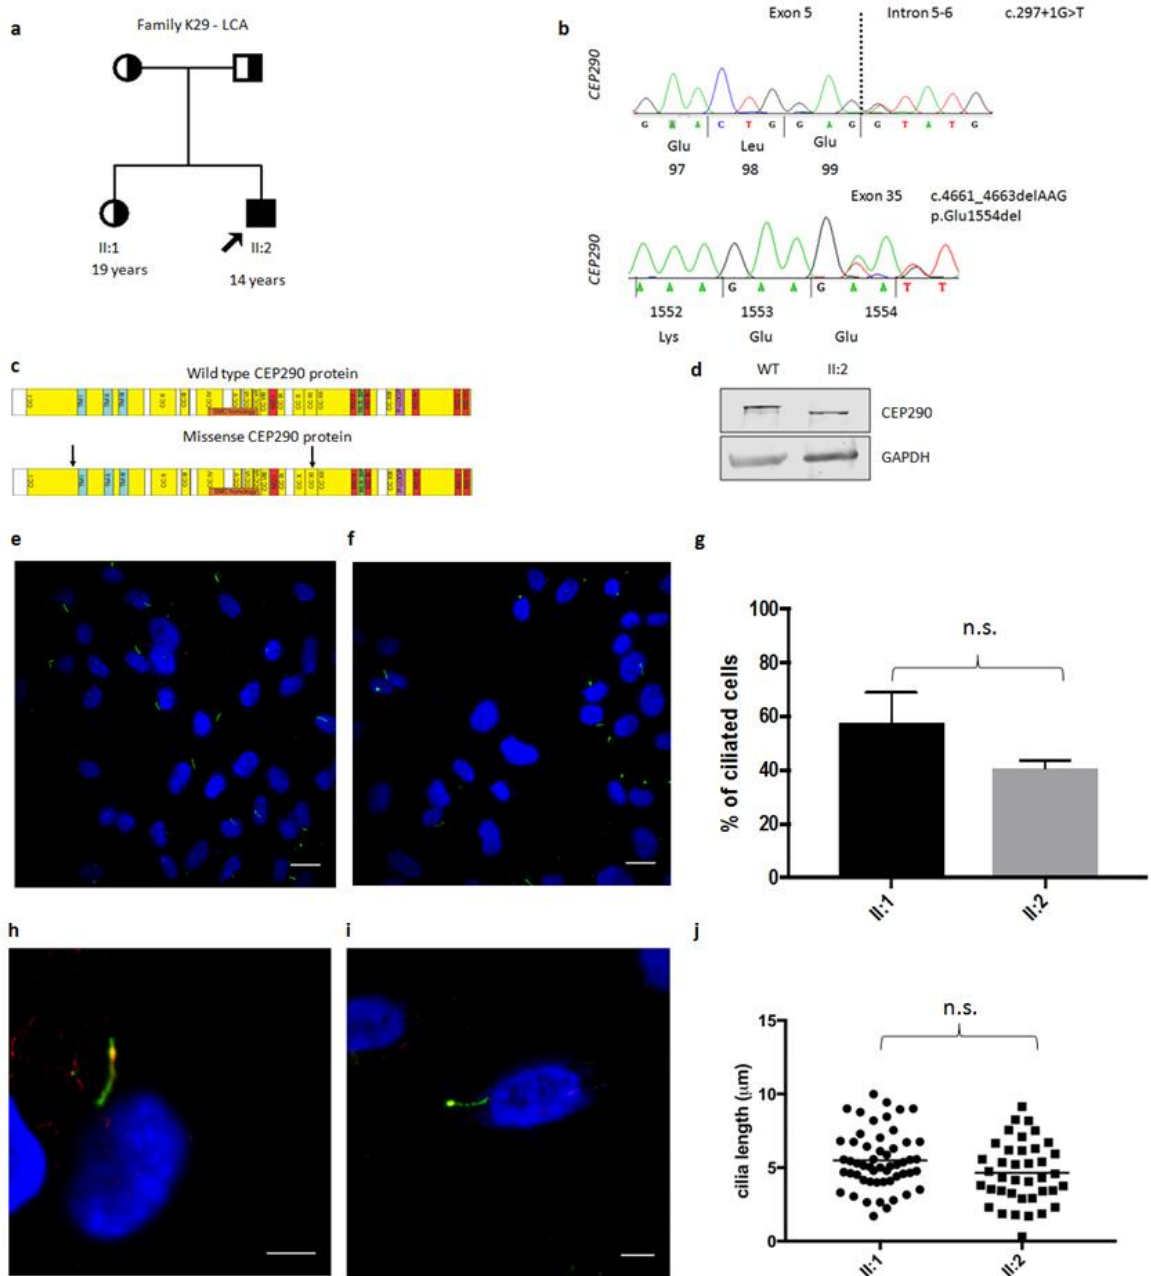

**Figure S3: Pedigree, genetic, biochemical and ciliary phenotype data of family LCA**

(a) Pedigree diagram showing one affected male with isolated Leber congenital amaurosis (normal renal function and normal brain development (squares, males; circles females)).

(b) Sequence chromatograms from II:2 showing compound heterozygous changes in *CEP290* c.297+1G>T (predicted to affect splice donor site) and c.4661\_4663delAAG; p.Q1554del.

(c) Domain structure of CEP290 protein (2479 amino acids) with predicted coiled coil domains (CC) numbered and shown in yellow; tropomyosin homology domain (TM), RepA/Rep<sup>+</sup> protein KID (KID); bipartite nuclear localization signal (NLS\_BP); ATP/GTP-binding site motif A (P-loop). The extent of homology with SMC proteins is indicated by an orange bar. The predicted defects of CEP290 at amino acid positions 99 and 1554 are shown.

(d) Western blot (cropped image) showing normal expression of full-length wild type CEP290 protein from hURECs derived from II:2 using a C-terminal directed CEP290 antibody.

(e) Low power immunofluorescence images (ARL13B-green; DAPI-blue) of hURECs from unaffected sibling II:1 (scale bar = 20  $\mu$ m).



- (f) Low power immunofluorescence images (ARL13B-green; DAPI-blue) of hURECs from affected sibling II:2 (scale bar = 20  $\mu\text{m}$ ).
- (g) Percentage ciliated hURECs (3 biological replicates) in unaffected II:1 (58%, n= 107) and affected LCA II:2 sibling (41%, n=61), n.s. not significant, Unpaired Student's t-test.
- (h) High power immunofluorescence images (ARL13B-green; alpha-acetylated tubulin-red; DAPI-blue) of hURECs from unaffected sibling II:1 (scale bar = 5  $\mu\text{m}$ ).
- (i) Low power immunofluorescence images (ARL13B-green; DAPI-blue) of hURECs from affected sibling LCA II:2 (scale bar = 5  $\mu\text{m}$ ).
- (j) Dot plot with means of hUREC cilia length in unaffected sibling (II:1) (n= 54) and affected sibling LCA II:2 (n=39), n.s. not significant, Unpaired Student's t-test.

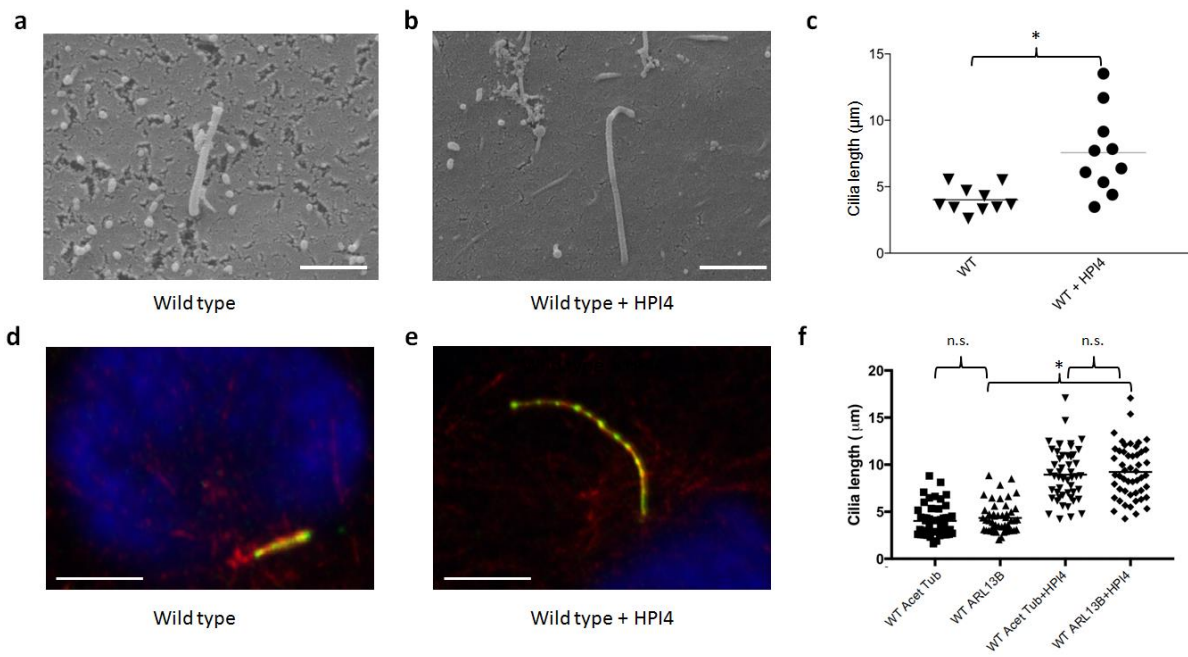

**Figure S4: Hh pathway manipulation of wild-type cilia in hURECs**

- (a) SEM image of cilia from wild type hURECs (Scale bar 2  $\mu\text{m}$ ).  
 (b) SEM images of cilia from wild type hURECs treated with Hh antagonist HPI-4 (Scale bar 2  $\mu\text{m}$ ).  
 (c) Dot plot with means showing quantification of ciliary lengths following EM imaging. \*  $p < 0.001$ , Unpaired Student's t-test.  
 (d) Immunofluorescence imaging (alpha-acetylated tubulin red; ARL13B green) of cilia from wild type hURECs (scale bar 5  $\mu\text{m}$ ).  
 (e) Immunofluorescence imaging (alpha-acetylated tubulin, red; ARL13B, green) of cilia from wild type hURECs treated with HPI-4 (Scale bar 5  $\mu\text{m}$ ).  
 (f) Dot plot with means showing quantification of ciliary lengths following immunofluorescence imaging (Acet Tub, alpha-acetylated tubulin; n.s. not significant, \*,  $p < 0.001$ , Unpaired Student's t-test).

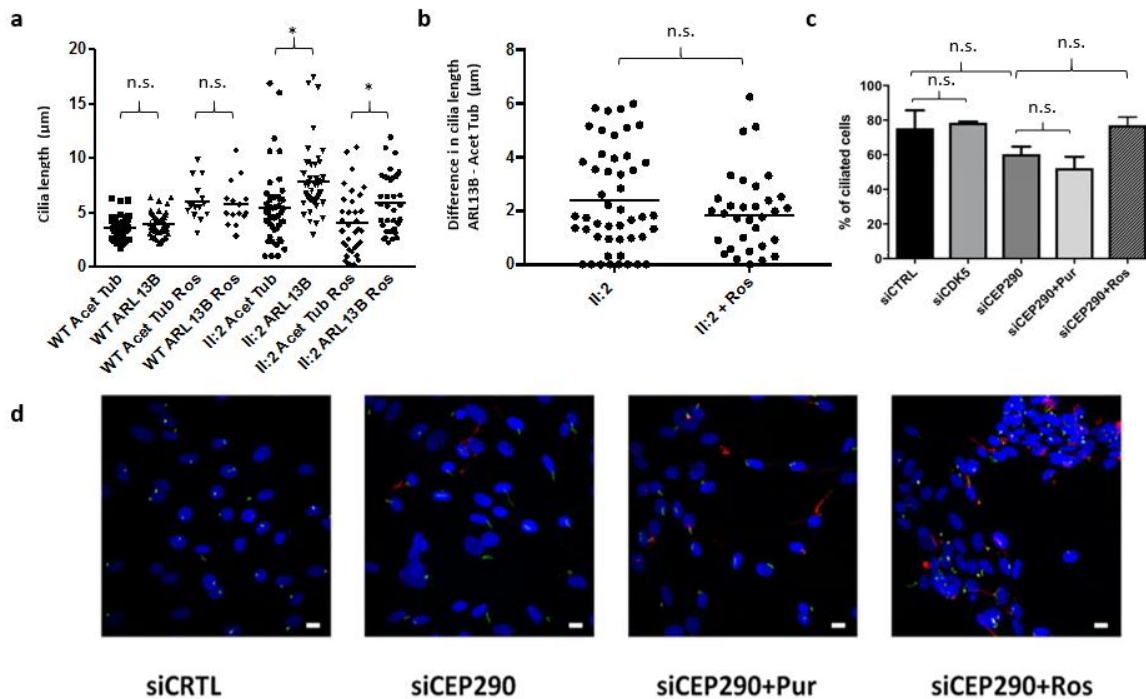

**Fig. S5: Response to treatments in II:2 hURECS and CEP290 depleted wild type hURECS**

(a) Dot plot with means to show quantification of cilia length using both alpha-acetylated tubulin (Acet Tub) and ARL13B in wild type (WT, n=48), wild type treated with roscovitine (WT + Ros, n=15), JBTS II:2 hURECS (n=48) and JBTS II:2 treated with roscovitine (Ros, n=34) treatment (n.s. not significant, \* p<0.0001, Paired Student's t- test).

(b) Dot plots with means indicated to show the difference in cilia length of each cilia (data from panel a) as determined by the measuring axonemal length under immunofluorescence imaging using antibodies against alpha-acetylated tubulin (Acet Tub) and ARL13B. (n.s, not significant, Unpaired Student's t-test)

(c) Percentage rates of ciliation in serum starved wild type cells treated with control siRNA (siCTRL); siRNA CDK5, (siCDK5); siRNA CEP290 (siCEP290); siRNA CEP290 + Purmorphamine (siCEP290+Pur) and siRNA CEP290 + Roscovitine (siCEP290+Ros). Experiments were performed in triplicate. The difference in percentage ciliation rates for siCTRL, siCDK5, siCEP290 and following Pur or Ros treatment was not significant (n.s. ANOVA).

(d) Low power images showing ciliation rates in wild type hURECs treated with control siRNA (siCTRL); siRNA CEP290 (siCEP290); siRNA CEP290 + purmorphamine (siCEP290+Pur) and siRNA CEP290 + roscovitine (siCEP290+Ros). Scale bar 10 µm.
